# Supplementary material for: Controllable synthesis of NH4Eu3F10nanospheres and application in bioimaging
Source: Royal Society of Chemistry journal article supplement (doi:10.1039/c3ce42193g), 2013-10-30
Supplement: c3ce42193g.pdf [file c3ce42193g.pdf]

## Electronic Supplementary Information (ESI)

### Controllable synthesis of $\text{NH}_4\text{Eu}_3\text{F}_{10}$ nanospheres and its application in bioimaging

Zhiyang Zhang<sup>1</sup>, Xiaoyan Ma<sup>1</sup>, Zhiming Chen<sup>1,2</sup>, Kuaibing Wang<sup>1,3</sup>, Yidan Wang<sup>1</sup>, Zhirong Geng<sup>1,\*</sup>, Zhilin Wang<sup>1,\*</sup>

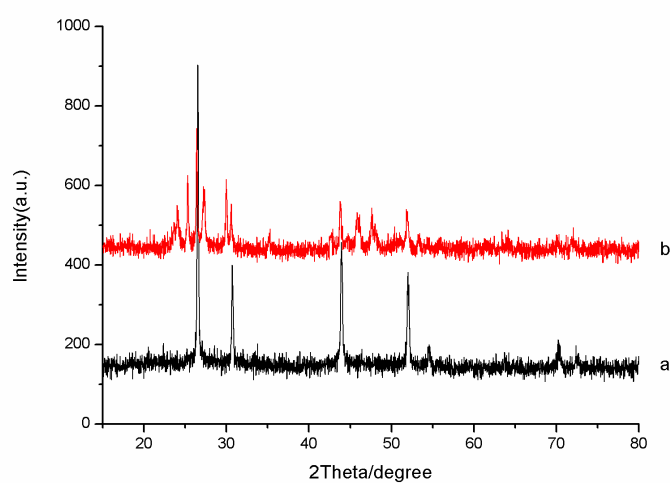

**Figure. S1** XRD patterns of products prepared in 5.5 mL ammonium hydroxide solution:(a) without oleic acid, (b) without EDTA.

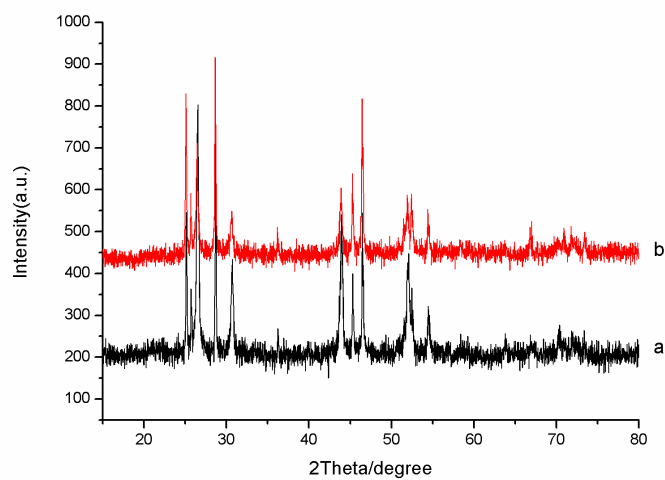

**Figure. S2** XRD patterns of products prepared in (a) 9.5 mL and (b) 10 mL ammonium hydroxide solution after 8 h hydrothermal treating.

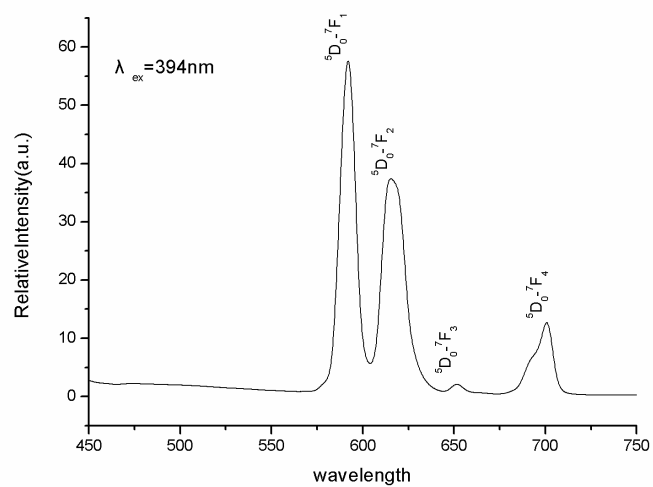

**Figure. S3** Down-conversion luminescence spectrum of  $\text{NH}_4\text{Eu}_3\text{F}_{10}$  nanospheres. ( $\lambda_{ex} = 394\text{ nm}$ ).

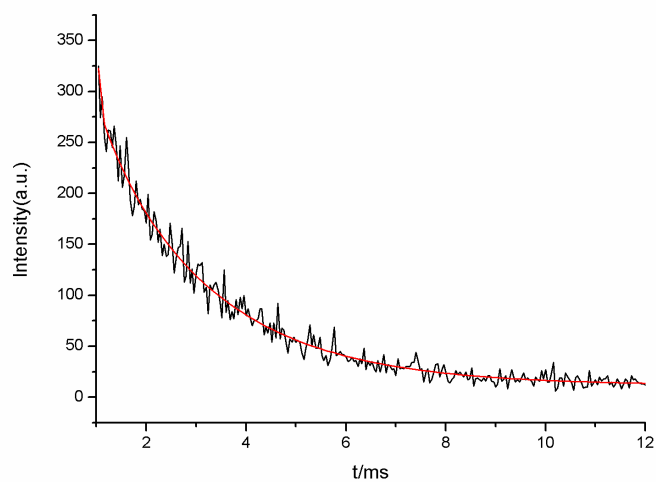

**Figure. S4** Decay curve of  $\text{Eu}^{3+}$  luminescence (592 nm) upon 394 nm UV excitation of  $\text{NH}_4\text{Eu}_3\text{F}_{10}$  nanospheres.

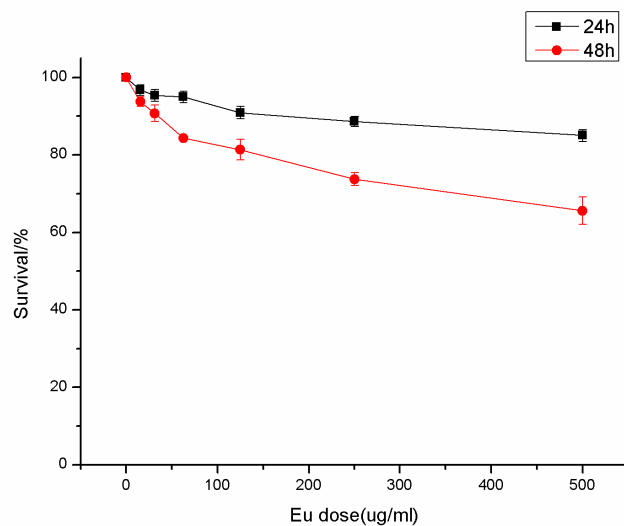

**Figure. S5** Cytotoxicity of as-prepared  $\text{NH}_4\text{Eu}_3\text{F}_{10}$  nanospheres against the human cervical cancer cell line determined by MTT assay after 24 h and 48 h.

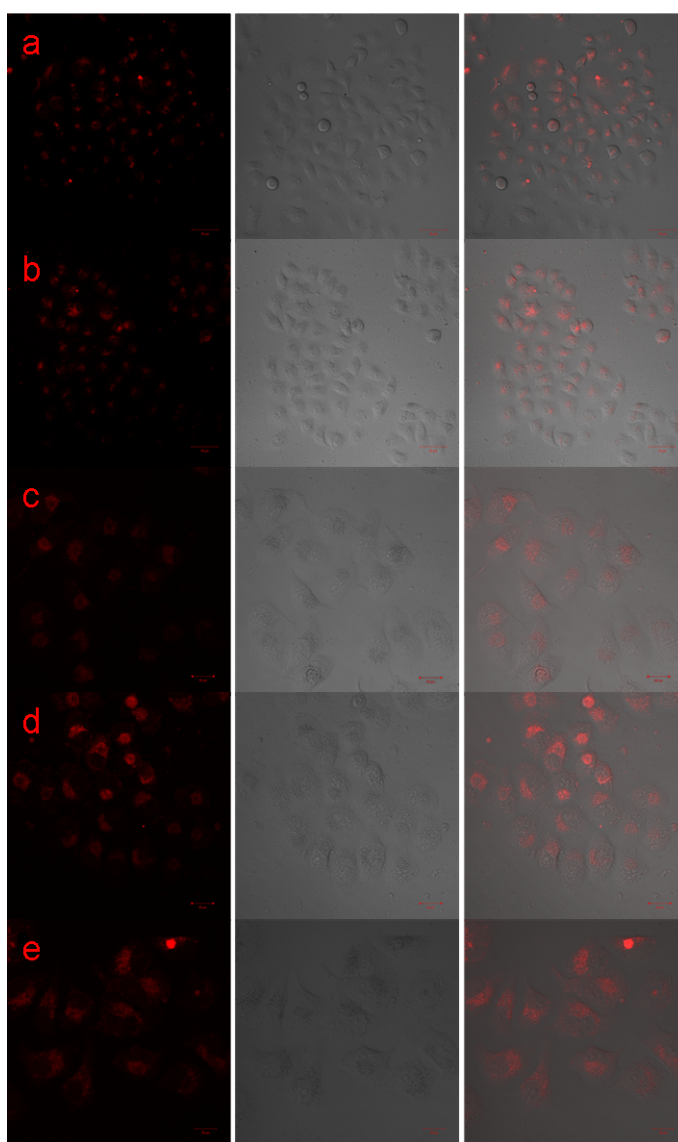

**Figure. S6** Exciting at 405 nm, CLFM images of HeLa cells stained with 100  $\mu\text{g/mL}$   $\text{NH}_4\text{Eu}_3\text{F}_{10}$  nanospheres at 37 °C for (a) 2h, (b) 6 h, (c) 18h, (d) 24h, (e) 48h on the left, the bright field images in the middle, and the merged images of bright field and CLFM images on the right.
